# Supplementary material
Source: HighWire-hosted journal article supplement (http://molpharm.aspetjournals.org/highwire/filestream/77127/field_highwire_adjunct_files/0/ObuchiRevised_Supplemental_File.pdf)
Supplement: ObuchiRevised_Supplemental_File.pdf [file ObuchiRevised_Supplemental_File.pdf]

**Identification of transporters associated with etoposide sensitivity of stomach cancer cell lines and methotrexate sensitivity of breast cancer cell lines by quantitative targeted absolute proteomics**

Wataru Obuchi, Sumio Ohtsuki, Yasuo Uchida, Ken Ohmine, Takao Yamori, Tetsuya Terasaki

**Molecular Pharmacology**

**Supplementary Table 1 Peptide probe sequences and selected ions for absolute quantification of membrane proteins and metabolic enzymes**

| Gene name | Alias  | Probe sequence                   | SRM/MRM transition (m/z) |       |       |       |       |
|-----------|--------|----------------------------------|--------------------------|-------|-------|-------|-------|
|           |        |                                  | Q1                       | Q3-1  | Q3-2  | Q3-3  | Q3-4  |
| ABCA9     | ABCA9  | QHISDAK                          | 399.7                    | 420.2 | 533.3 | 581.3 | 652.3 |
|           |        | QHISDA <b><u>L</u></b> *K        | 401.7                    | 424.2 | 537.3 | 581.3 | 656.3 |
| ABCB5     | ABCB5  | SADLIVTLK                        | 480.3                    | 686.5 | 801.5 | 573.4 | 460.3 |
|           |        | SADLIVT <b><u>L</u></b> *K       | 483.8                    | 693.5 | 808.5 | 580.4 | 467.3 |
| SLC16A3   | MCT4   | LLDLSVFR                         | 482.4                    | 849.5 | 736.4 | 621.4 | 508.3 |
|           |        | LLDLSV <b><u>F</u></b> *R        | 487.4                    | 859.5 | 746.4 | 631.4 | 518.3 |
| SLC22A9   | UST3   | DTLTLEILK                        | 523.4                    | 716.4 | 829.5 | 502.3 | 615.4 |
|           |        | DTLTLEI <b><u>L</u></b> *K       | 526.9                    | 723.4 | 836.5 | 509.3 | 622.4 |
| SLC22A14  | OCTL2  | DQPLSESLNHSSQIR                  | 570.9                    | 590.3 | 727.4 | 503.3 | 841.4 |
|           |        | DQPLSESLNHSSQ <b><u>I</u></b> *R | 573.2                    | 597.3 | 734.4 | 510.3 | 848.4 |
| SLC47A2   | MATE2  | YLQNQGWLK                        | 575.3                    | 873.5 | 745.4 | 631.4 | 986.5 |
|           |        | YLQNQGW <b><u>L</u></b> *K       | 578.8                    | 880.5 | 752.4 | 638.4 | 993.5 |
| SLC47A2   | MATE2k | TPEEAHALSAPTSR                   | 733.9                    | 939.5 | 802.4 | 731.4 | 618.3 |
|           |        | TPEEAHALSAP <b><u>P</u></b> *TSR | 736.9                    | 945.5 | 808.4 | 737.4 | 624.3 |
| DHFR      | DHFR   | NGDLPWPPLR                       | 582.8                    | 765.4 | 482.3 | 668.4 | 385.3 |
|           |        | NGDLPWP <b><u>P</u></b> *L       | 586.3                    | 772.4 | 489.3 | 675.4 | 392.3 |
| FPGS      | FPGS   | DPIFQPPSPPK                      | 611.8                    | 622.4 | 341.2 | 897.5 | 750.4 |
|           |        | DPIFQPPSP <b><u>P</u></b> *K     | 614.8                    | 628.4 | 347.2 | 903.5 | 756.4 |
| GGH       | GGH    | YYIAASYVK                        | 539.3                    | 638.4 | 567.3 | 751.4 | 496.3 |
|           |        | YYIAASY <b><u>V</u></b> *K       | 542.3                    | 644.4 | 573.3 | 757.4 | 502.3 |

Typically, doubly charged precursor ions (singly charged for some peptides) were selected (Q1). Four transitions per peptide (Q3-1, -2, -3 and -4), corresponding to high-intensity fragment ions, were selected. Bold letters with asterisks indicate amino acid residues labeled with stable isotope (<sup>13</sup>C and <sup>15</sup>N). Other peptides were listed in previous reports (Ohtsuki et al., 2011; Uchida et al., 2011).

Ohtsuki S, Uchida Y, Kubo Y and Terasaki T (2011) Quantitative targeted absolute proteomics-based ADME research as a new path to drug discovery and development: methodology, advantages, strategy, and prospects. *J Pharm Sci* **100**(9):3547-3559.

Uchida Y, Ohtsuki S, Katsukura Y, Ikeda C, Suzuki T, Kamiie J and Terasaki T (2011) Quantitative targeted absolute proteomics of human blood-brain barrier

transporters and receptors. *J Neurochem* **117**(2):333-345.

**Supplementary Table 2 Conditions of LC-MS/MS analysis in uptake studies**

| Molecule             | SRM/MRM transition (m/z) |       | DP (V) | CE (V) |
|----------------------|--------------------------|-------|--------|--------|
|                      | Q1                       | Q3    |        |        |
| Etoposide            | 589.2                    | 229.2 | 76     | 23     |
| Gemcitabine          | 264.1                    | 112.1 | 66     | 25     |
| Methotrexate (MTX)   | 455.4                    | 308.2 | 151    | 27     |
| MTX-Glu <sub>2</sub> | 584.6                    | 308.2 | 156    | 37     |
| MTX-Glu <sub>3</sub> | 713.7                    | 308.2 | 181    | 47     |
| MTX-Glu <sub>4</sub> | 842.8                    | 308.2 | 150    | 51     |
| MTX-Glu <sub>5</sub> | 971.9                    | 308.2 | 150    | 63     |
| MTX-Glu <sub>6</sub> | 1101.0                   | 308.2 | 150    | 78     |
| MTX-Glu <sub>7</sub> | 1230.1                   | 308.2 | 150    | 89     |

## Supplementary Information 1. Derivation of Eq. 1 and 2

Based on the model shown in Fig S1A, medium-to-cell influx rate and cell-to-medium efflux rate are described as:

$$\text{Medium-to-cell influx rate} = PS_{\text{inf}} \times C_{\text{medium}} \quad \text{Supp Eq. 1}$$

$$\text{Cell-to-medium efflux rate} = (PS_{\text{eff,MK insensitive}} + PS_{\text{eff,MK sensitive}}) \times C_{\text{cell}} \quad \text{Supp Eq. 2}$$

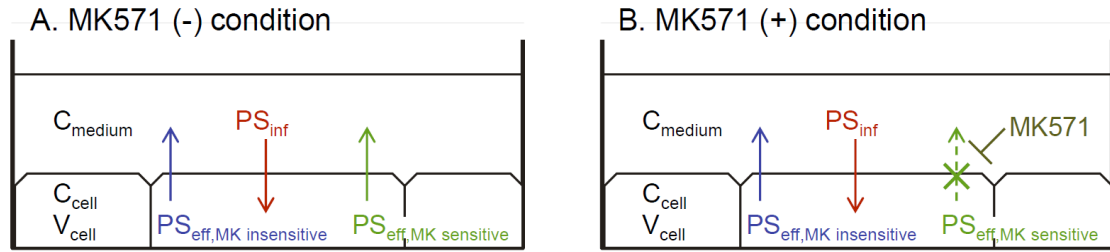

Fig S1. Schematic diagram illustrating the PS products for the accumulation of substrates in human stomach cancer cells.

$PS_{\text{inf}}$ ,  $PS_{\text{eff,MK insensitive}}$  and  $PS_{\text{eff,MK sensitive}}$  represent influx clearance, MK571-insensitive efflux clearance and MK571-sensitive efflux clearance, respectively.

$C_{\text{medium}}$  and  $C_{\text{cell}}$  represent drug concentration in medium (nM) and cell (nmol/ $\mu\text{g}$  cellular protein), respectively.  $V_{\text{cell}}$  represents volume of cells ( $\mu\text{L}$ ).

Cell-to-medium (C/M) ratio represents the apparent distribution volume of the substrate in the cell generated by the polarized transport rate across the plasma membrane, and is defined as  $(C_{\text{cell}} \times V_{\text{cell}}) / C_{\text{medium}}$ . Considering the steady-state condition, medium-to-cell influx rate is equal to cell-to-medium efflux rate. Therefore, steady-state  $C/M_{\text{ss}}$  ratio can be transformed to Eq.1 in the text using Supp Eq. 1 and 2.

$$PS_{\text{inf}} \times C_{\text{medium}} = (PS_{\text{eff,MK insensitive}} + PS_{\text{eff,MK sensitive}}) \times C_{\text{cell}}$$

$$C/M_{\text{ss}} \text{ ratio} = (C_{\text{cell}} \times V_{\text{cell}}) / C_{\text{medium}} = PS_{\text{inf}} \times V_{\text{cell}} / (PS_{\text{eff,MK insensitive}} + PS_{\text{eff,MK sensitive}})$$

Eq. 1 in the text

In the presence of MK571,  $PS_{\text{eff,MK sensitive}}$  becomes zero, as shown in Fig S1B. Therefore, steady-state  $C/M_{\text{ss}}$  ratio, MK571 can be described as:

$$C/M_{\text{ss}} \text{ ratio, MK571} = PS_{\text{inf}} \times V_{\text{cell}} / PS_{\text{eff,MK insensitive}}$$

Then, Eq. 2 in the text was derived as follows:

$$\begin{aligned} & 1/(C/M_{ss} \text{ ratio}) - 1/(C/M_{ss} \text{ ratio, MK571}) \\ &= (PS_{\text{eff, MK insensitive}} + PS_{\text{eff, MK sensitive}}) / (PS_{\text{inf}} \times V_{\text{cell}}) - PS_{\text{eff, MK insensitive}} / (PS_{\text{inf}} \times V_{\text{cell}}) \\ &= PS_{\text{eff, MK sensitive}} / (PS_{\text{inf}} \times V_{\text{cell}}) \end{aligned}$$

Eq. 2 in the text
